# Supplementary material for: Feasibility of the Perceive, Recall, Plan and Perform system of intervention for persons with brain injury in community-based rehabilitation: a pilot for a multiple-baseline design study
Source: HighWire-hosted journal article supplement (doi:10.1136/bmjopen-2022-067593), 2023-06-01
Supplement: bmjopen-2022-067593supp002_data_supplement.pdf [file bmjopen-2022-067593supp002_data_supplement.pdf]

Participant: Pilot Anne

**Procedural fidelity checklist:** A step-by-step checklist is made for the therapists to follow, and they tick off when completed. High fidelity is suggested by at least 80% agreement to the procedural checklist (Tate & Perdices, 2019).

(number of agreements) X 100  
(number of agreements)+(number of disagreements)  
Formula p.200 Tate&Perdices, 2019

| Completed                                                                                                                                                        | Number | Item                                                   | Comment |
|------------------------------------------------------------------------------------------------------------------------------------------------------------------|--------|--------------------------------------------------------|---------|
| <b>Consent and enrolment</b>                                                                                                                                     |        |                                                        |         |
| X                                                                                                                                                                | 1      | Inform and ask to participate, oral or written consent |         |
| X                                                                                                                                                                | 2      | Ask participant about video recording                  |         |
| X                                                                                                                                                                | 3      | Inform team about not giving PRPP-like intervention    |         |
| X                                                                                                                                                                | 4      | Allocate participant to baseline phase 3, 5 or 7 days  |         |
| <b>Comment:</b>                                                                                                                                                  |        |                                                        |         |
| <b>Baseline phase</b>                                                                                                                                            |        |                                                        |         |
| X                                                                                                                                                                | 5      | PRPP Assessment stage 1                                |         |
| X                                                                                                                                                                | 6      | PRPP Assessment stage 1                                |         |
| X                                                                                                                                                                | 7      | PRPP Assessment stage 1                                |         |
| X                                                                                                                                                                | 8      | PRPP Assessment stage 1                                |         |
| X                                                                                                                                                                | 9      | PRPP Assessment stage 1                                |         |
| X                                                                                                                                                                | 10     | PRPP Assessment stage 1 video rec./another assessor    |         |
| X                                                                                                                                                                | 11     | PRPP Assessment stage 2                                |         |
| X                                                                                                                                                                | 12     | PRPP Assessment stage 2                                |         |
| X                                                                                                                                                                | 13     | PRPP Assessment stage 2                                |         |
| X                                                                                                                                                                | 14     | PRPP Assessment stage 2                                |         |
| X                                                                                                                                                                | 15     | PRPP Assessment stage 2                                |         |
| X                                                                                                                                                                | 16     | PRPP Assessment stage 2 video rec./another assessor    |         |
| X                                                                                                                                                                | 17     | Barthel Index                                          |         |
| X                                                                                                                                                                | 18     | GAS                                                    |         |
| <b>Comment:</b> No video recording because of intimate situations, but another assessor not blinded assessed at least 20%.                                       |        |                                                        |         |
| <b>Intervention phase</b>                                                                                                                                        |        |                                                        |         |
| X                                                                                                                                                                | 19     | Intervention plan written                              |         |
| X                                                                                                                                                                | 20     | PRPP Intervention 45-60 min                            |         |
| X                                                                                                                                                                | 21     | PRPP Intervention 45-60 min                            |         |
| X                                                                                                                                                                | 22     | PRPP Intervention 45-60 min                            |         |
| X                                                                                                                                                                | 23     | PRPP Intervention 45-60 min                            |         |
| X                                                                                                                                                                | 24     | PRPP Intervention 45-60 min                            |         |
| X                                                                                                                                                                | 25     | PRPP Intervention 45-60 min                            |         |
| X                                                                                                                                                                | 26     | PRPP Intervention 45-60 min                            |         |
| X                                                                                                                                                                | 27     | PRPP Intervention 45-60 min                            |         |
| X                                                                                                                                                                | 28     | PRPP Intervention 45-60 min                            |         |
| X                                                                                                                                                                | 29     | PRPP Assessment stage 1                                |         |
| X                                                                                                                                                                | 30     | PRPP Assessment stage 1                                |         |
| X                                                                                                                                                                | 31     | PRPP Assessment stage 1                                |         |
| X                                                                                                                                                                | 32     | PRPP Assessment stage 1                                |         |
| X                                                                                                                                                                | 33     | PRPP Assessment stage 1                                |         |
| X                                                                                                                                                                | 34     | PRPP Assessment stage 1 video rec./another assessor    |         |
| X                                                                                                                                                                | 35     | PRPP Assessment stage 2                                |         |
| X                                                                                                                                                                | 36     | PRPP Assessment stage 2                                |         |
| X                                                                                                                                                                | 37     | PRPP Assessment stage 2                                |         |
| X                                                                                                                                                                | 38     | PRPP Assessment stage 2                                |         |
| X                                                                                                                                                                | 39     | PRPP Assessment stage 2                                |         |
| X                                                                                                                                                                | 40     | PRPP Assessment stage 2 video rec./another assessor    |         |
| <b>Comment:</b> Had 10 sessions of PRPP intervention. No video recording because of intimate situations, but another assessor not blinded assessed at least 20%. |        |                                                        |         |

| Post-intervention phase                                                                                                                                                                                                                                                                                                                                                                                                                                                                                                        |    |                                                      |   |
|--------------------------------------------------------------------------------------------------------------------------------------------------------------------------------------------------------------------------------------------------------------------------------------------------------------------------------------------------------------------------------------------------------------------------------------------------------------------------------------------------------------------------------|----|------------------------------------------------------|---|
| (X)                                                                                                                                                                                                                                                                                                                                                                                                                                                                                                                            | 41 | PRPP Assessment stage 1                              |   |
| (X)                                                                                                                                                                                                                                                                                                                                                                                                                                                                                                                            | 42 | PRPP Assessment stage 1                              |   |
| (X)                                                                                                                                                                                                                                                                                                                                                                                                                                                                                                                            | 43 | PRPP Assessment stage 1                              |   |
| (X)                                                                                                                                                                                                                                                                                                                                                                                                                                                                                                                            | 44 | PRPP Assessment stage 1                              |   |
| (X)                                                                                                                                                                                                                                                                                                                                                                                                                                                                                                                            | 45 | PRPP Assessment stage 1                              |   |
|                                                                                                                                                                                                                                                                                                                                                                                                                                                                                                                                | 46 | PRPP Assessment stage 1 video rec./another assessor  |   |
|                                                                                                                                                                                                                                                                                                                                                                                                                                                                                                                                | 47 | PRPP Assessment stage 2                              |   |
|                                                                                                                                                                                                                                                                                                                                                                                                                                                                                                                                | 48 | PRPP Assessment stage 2                              |   |
|                                                                                                                                                                                                                                                                                                                                                                                                                                                                                                                                | 49 | PRPP Assessment stage 2                              |   |
|                                                                                                                                                                                                                                                                                                                                                                                                                                                                                                                                | 50 | PRPP Assessment stage 2                              |   |
|                                                                                                                                                                                                                                                                                                                                                                                                                                                                                                                                | 51 | PRPP Assessment stage 2                              |   |
|                                                                                                                                                                                                                                                                                                                                                                                                                                                                                                                                | 52 | PRPP Assessment stage 2 video rec./another assessor  |   |
| (X)                                                                                                                                                                                                                                                                                                                                                                                                                                                                                                                            | 53 | Barthel Index                                        | * |
| X                                                                                                                                                                                                                                                                                                                                                                                                                                                                                                                              | 54 | GAS                                                  |   |
| <b>Comment:</b>                                                                                                                                                                                                                                                                                                                                                                                                                                                                                                                |    |                                                      |   |
| Post-intervention after 14 days delays due to hospital-stay with lung-emboli and poor general conditions. Participant had then had 14 days lying in bed. The week after starting up again, there were sick leave among the OTs resulting post-intervention PRPP stage 1 was assessed, but stage 2 data was forgotten. When OT came back from sick leave, the participant was transferred to specialist rehabilitation. *Barthel Index was then scored after participant left, after observations done before participant left. |    |                                                      |   |
| Follow-up phase                                                                                                                                                                                                                                                                                                                                                                                                                                                                                                                |    |                                                      |   |
|                                                                                                                                                                                                                                                                                                                                                                                                                                                                                                                                | 55 | PRPP Assessment stage 1                              |   |
|                                                                                                                                                                                                                                                                                                                                                                                                                                                                                                                                | 56 | PRPP Assessment stage 1                              |   |
|                                                                                                                                                                                                                                                                                                                                                                                                                                                                                                                                | 57 | PRPP Assessment stage 1                              |   |
|                                                                                                                                                                                                                                                                                                                                                                                                                                                                                                                                | 58 | PRPP Assessment stage 1                              |   |
|                                                                                                                                                                                                                                                                                                                                                                                                                                                                                                                                | 59 | PRPP Assessment stage 1 (video/2.assessor?)          |   |
|                                                                                                                                                                                                                                                                                                                                                                                                                                                                                                                                | 60 | PRPP Assessment stage 1 video rec./another assessor  |   |
|                                                                                                                                                                                                                                                                                                                                                                                                                                                                                                                                | 61 | New task PRPP Assessment stage 1 (video/2.assessor?) |   |
|                                                                                                                                                                                                                                                                                                                                                                                                                                                                                                                                | 62 | New task PRPP Assessment stage 1                     |   |
|                                                                                                                                                                                                                                                                                                                                                                                                                                                                                                                                | 63 | PRPP Assessment stage 2                              |   |
|                                                                                                                                                                                                                                                                                                                                                                                                                                                                                                                                | 64 | PRPP Assessment stage 2                              |   |
|                                                                                                                                                                                                                                                                                                                                                                                                                                                                                                                                | 65 | PRPP Assessment stage 2                              |   |
|                                                                                                                                                                                                                                                                                                                                                                                                                                                                                                                                | 66 | PRPP Assessment stage 2                              |   |
|                                                                                                                                                                                                                                                                                                                                                                                                                                                                                                                                | 67 | PRPP Assessment stage 2 (video/2.assessor?)          |   |
|                                                                                                                                                                                                                                                                                                                                                                                                                                                                                                                                | 68 | PRPP Assessment stage 2 video rec./another assessor  |   |
|                                                                                                                                                                                                                                                                                                                                                                                                                                                                                                                                | 69 | New task PRPP Assessment stage 2 (video/2.assessor?) |   |
|                                                                                                                                                                                                                                                                                                                                                                                                                                                                                                                                | 70 | New task PRPP Assessment stage 2                     |   |
|                                                                                                                                                                                                                                                                                                                                                                                                                                                                                                                                | 71 | Barthel Index                                        |   |
|                                                                                                                                                                                                                                                                                                                                                                                                                                                                                                                                | 72 | GAS                                                  |   |
| <b>Comment:</b> Lost to follow-up due to several infections and hospital transfers.                                                                                                                                                                                                                                                                                                                                                                                                                                            |    |                                                      |   |
| Other                                                                                                                                                                                                                                                                                                                                                                                                                                                                                                                          |    |                                                      |   |
| X                                                                                                                                                                                                                                                                                                                                                                                                                                                                                                                              | 73 | Demographic data                                     |   |
| X                                                                                                                                                                                                                                                                                                                                                                                                                                                                                                                              | 74 | Note about PRPP-intervention given by others         |   |
| X                                                                                                                                                                                                                                                                                                                                                                                                                                                                                                                              | 75 | Document about treatment as usual                    |   |
| X                                                                                                                                                                                                                                                                                                                                                                                                                                                                                                                              | 76 | Document - influence on data collection or results   |   |

|                                                                                                                                                                      |                                                            |                |
|----------------------------------------------------------------------------------------------------------------------------------------------------------------------|------------------------------------------------------------|----------------|
| Step-by-step checklist: 76 items<br>80% of 76 items= 60,8.<br>18 not completed, 56 completed, disagreements: 20<br>Without the follow-up phase: : 37 of 44 agreement | 56x100=5600/56+20 = 73,68%<br><br>37x100=3700/37+7 = 84,09 | 74%<br><br>84% |
|----------------------------------------------------------------------------------------------------------------------------------------------------------------------|------------------------------------------------------------|----------------|

Participant: Pilot Birger

**Procedural fidelity checklist:** A step-by-step checklist is made for the therapists to follow, and they tick off when completed. High fidelity is suggested by at least 80% agreement to the procedural checklist (Tate & Perdices, 2019).

(number of agreements) X 100  
(number of agreements)+(number of disagreements)  
Formula p.200 Tate&Perdices, 2019

| Completed                                                                                                                                       | Number | Item                                                   | Comment          |
|-------------------------------------------------------------------------------------------------------------------------------------------------|--------|--------------------------------------------------------|------------------|
| <b>Consent and enrolment</b>                                                                                                                    |        |                                                        |                  |
| X                                                                                                                                               | 1      | Inform and ask to participate, oral or written consent |                  |
| X                                                                                                                                               | 2      | Ask participant about video recording                  |                  |
| X                                                                                                                                               | 3      | Inform team about not giving PRPP-like intervention    |                  |
| X                                                                                                                                               | 4      | Allocate participant to baseline phase 3, 5 or 7 days  | 7 (8) days       |
| <b>Comment:</b>                                                                                                                                 |        |                                                        |                  |
| <b>Baseline phase</b>                                                                                                                           |        |                                                        |                  |
| X                                                                                                                                               | 5      | PRPP Assessment stage 1                                |                  |
| X                                                                                                                                               | 6      | PRPP Assessment stage 1                                |                  |
| X                                                                                                                                               | 7      | PRPP Assessment stage 1                                |                  |
| X                                                                                                                                               | 8      | PRPP Assessment stage 1                                |                  |
| X                                                                                                                                               | 9      | PRPP Assessment stage 1                                | Another assessor |
|                                                                                                                                                 | 10     | PRPP Assessment stage 1 video rec./another assessor    |                  |
| X                                                                                                                                               | 11     | PRPP Assessment stage 2                                |                  |
| X                                                                                                                                               | 12     | PRPP Assessment stage 2                                |                  |
| X                                                                                                                                               | 13     | PRPP Assessment stage 2                                |                  |
| X                                                                                                                                               | 14     | PRPP Assessment stage 2                                |                  |
| X                                                                                                                                               | 15     | PRPP Assessment stage 2                                | Another assessor |
|                                                                                                                                                 | 16     | PRPP Assessment stage 2 video rec./another assessor    |                  |
| X                                                                                                                                               | 17     | Barthel Index                                          |                  |
| X                                                                                                                                               | 18     | GAS                                                    |                  |
| <b>Comment:</b> No video recording, but another assessor not blinded assessed at one task – but the conducting OT did not assess the same task. |        |                                                        |                  |
| <b>Intervention phase</b>                                                                                                                       |        |                                                        |                  |
| X                                                                                                                                               | 19     | Intervention plan written                              |                  |
| X                                                                                                                                               | 20     | PRPP Intervention 45-60 min                            |                  |
| X                                                                                                                                               | 21     | PRPP Intervention 45-60 min                            |                  |
| X                                                                                                                                               | 22     | PRPP Intervention 45-60 min                            |                  |
| X                                                                                                                                               | 23     | PRPP Intervention 45-60 min                            |                  |
| X                                                                                                                                               | 24     | PRPP Intervention 45-60 min                            |                  |
| X                                                                                                                                               | 25     | PRPP Intervention 45-60 min                            |                  |
| X                                                                                                                                               | 26     | PRPP Intervention 45-60 min                            |                  |
|                                                                                                                                                 | 27     | PRPP Intervention 45-60 min                            | *                |
|                                                                                                                                                 | 28     | PRPP Intervention 45-60 min                            | *                |
| X                                                                                                                                               | 29     | PRPP Assessment stage 1                                |                  |
| X                                                                                                                                               | 30     | PRPP Assessment stage 1                                |                  |
| X                                                                                                                                               | 31     | PRPP Assessment stage 1                                |                  |
| X                                                                                                                                               | 32     | PRPP Assessment stage 1                                |                  |
|                                                                                                                                                 | 33     | PRPP Assessment stage 1                                | Another assessor |
| X                                                                                                                                               | 34     | PRPP Assessment stage 1 video rec./another assessor    |                  |
| X                                                                                                                                               | 35     | PRPP Assessment stage 2                                |                  |
| X                                                                                                                                               | 36     | PRPP Assessment stage 2                                |                  |
| X                                                                                                                                               | 37     | PRPP Assessment stage 2                                |                  |
| X                                                                                                                                               | 38     | PRPP Assessment stage 2                                |                  |
|                                                                                                                                                 | 39     | PRPP Assessment stage 2                                | Another assessor |
| X                                                                                                                                               | 40     | PRPP Assessment stage 2 video rec./another assessor    |                  |

|                                                                                                                                                                                                                                                                                                                           |    |                                                     |                      |
|---------------------------------------------------------------------------------------------------------------------------------------------------------------------------------------------------------------------------------------------------------------------------------------------------------------------------|----|-----------------------------------------------------|----------------------|
| <b>Comment:</b> *The last week of the stay he missed 2 sessions of intervention. Had 7 sessions and not 9 of PRPP intervention, due to sick-leave and vacation for OTs. No video recording, but another assessor not blinded assessed at one task – but the conducting OT did not assess the same task. Misunderstanding. |    |                                                     |                      |
| <b>Post-intervention phase</b>                                                                                                                                                                                                                                                                                            |    |                                                     |                      |
| X                                                                                                                                                                                                                                                                                                                         | 41 | PRPP Assessment stage 1                             |                      |
| X                                                                                                                                                                                                                                                                                                                         | 42 | PRPP Assessment stage 1                             |                      |
| X                                                                                                                                                                                                                                                                                                                         | 43 | PRPP Assessment stage 1                             |                      |
| X                                                                                                                                                                                                                                                                                                                         | 44 | PRPP Assessment stage 1                             |                      |
| X                                                                                                                                                                                                                                                                                                                         | 45 | PRPP Assessment stage 1                             | Video                |
| X                                                                                                                                                                                                                                                                                                                         | 46 | PRPP Assessment stage 1 video rec./another assessor | Blinded–independ. OT |
| X                                                                                                                                                                                                                                                                                                                         | 47 | PRPP Assessment stage 2                             |                      |
| X                                                                                                                                                                                                                                                                                                                         | 48 | PRPP Assessment stage 2                             |                      |
| X                                                                                                                                                                                                                                                                                                                         | 49 | PRPP Assessment stage 2                             |                      |
| X                                                                                                                                                                                                                                                                                                                         | 50 | PRPP Assessment stage 2                             |                      |
| X                                                                                                                                                                                                                                                                                                                         | 51 | PRPP Assessment stage 2                             | Video                |
| X                                                                                                                                                                                                                                                                                                                         | 52 | PRPP Assessment stage 2 video rec./another assessor |                      |
| X                                                                                                                                                                                                                                                                                                                         | 53 | Barthel Index                                       |                      |
| X                                                                                                                                                                                                                                                                                                                         | 54 | GAS                                                 |                      |
| <b>Comment:</b> Video recording of putting on t-shirt                                                                                                                                                                                                                                                                     |    |                                                     |                      |
| <b>Follow-up phase</b>                                                                                                                                                                                                                                                                                                    |    |                                                     |                      |
| X                                                                                                                                                                                                                                                                                                                         | 55 | PRPP Assessment stage 1                             | video                |
| X                                                                                                                                                                                                                                                                                                                         | 56 | PRPP Assessment stage 1                             |                      |
| X                                                                                                                                                                                                                                                                                                                         | 57 | PRPP Assessment stage 1                             |                      |
| X                                                                                                                                                                                                                                                                                                                         | 58 | PRPP Assessment stage 1                             |                      |
| X                                                                                                                                                                                                                                                                                                                         | 59 | PRPP Assessment stage 1                             | Video                |
| X                                                                                                                                                                                                                                                                                                                         | 60 | PRPP Assessment stage 1 video rec./another assessor | Blinded–independ. OT |
| X                                                                                                                                                                                                                                                                                                                         | 61 | New task PRPP Assessment stage 1                    |                      |
| X                                                                                                                                                                                                                                                                                                                         | 62 | New task PRPP Assessment stage 1                    |                      |
| X                                                                                                                                                                                                                                                                                                                         | 63 | PRPP Assessment stage 2                             | video                |
| X                                                                                                                                                                                                                                                                                                                         | 64 | PRPP Assessment stage 2                             |                      |
| X                                                                                                                                                                                                                                                                                                                         | 65 | PRPP Assessment stage 2                             |                      |
| X                                                                                                                                                                                                                                                                                                                         | 66 | PRPP Assessment stage 2                             |                      |
| X                                                                                                                                                                                                                                                                                                                         | 67 | PRPP Assessment stage 2                             | video                |
| X                                                                                                                                                                                                                                                                                                                         | 68 | PRPP Assessment stage 2 video rec./another assessor | Blinded–independ. OT |
| X                                                                                                                                                                                                                                                                                                                         | 69 | New task PRPP Assessment stage 2                    |                      |
| X                                                                                                                                                                                                                                                                                                                         | 70 | New task PRPP Assessment stage 2                    |                      |
| X                                                                                                                                                                                                                                                                                                                         | 71 | Barthel Index                                       |                      |
| X                                                                                                                                                                                                                                                                                                                         | 72 | GAS                                                 |                      |
| <b>Comment:</b> Video recording of putting on t-shirt and shoes                                                                                                                                                                                                                                                           |    |                                                     |                      |
| <b>Other</b>                                                                                                                                                                                                                                                                                                              |    |                                                     |                      |
| X                                                                                                                                                                                                                                                                                                                         | 73 | Demographic data                                    |                      |
| X                                                                                                                                                                                                                                                                                                                         | 74 | Note about PRPP-intervention given by others        |                      |
| X                                                                                                                                                                                                                                                                                                                         | 75 | Document about treatment as usual                   |                      |
| X                                                                                                                                                                                                                                                                                                                         | 76 | Document - influence on data collection or results  |                      |

|                                                                                              |                                  |                       |
|----------------------------------------------------------------------------------------------|----------------------------------|-----------------------|
| Step-by-step checklist: 76 items<br>80% of 76 items= 60,8.<br>69 agreements, 7 disagreements | 69x100 = 6900<br>6900/76 = 90,78 | Overall fidelity: 91% |
|----------------------------------------------------------------------------------------------|----------------------------------|-----------------------|

Participant: Pilot Carl

**Procedural fidelity checklist:** A step-by-step checklist is made for the therapists to follow, and they tick off when completed. High fidelity is

suggested by at least 80% agreement to the procedural checklist (Tate & Perdices, 2019).

(number of agreements) X 100  
 (number of agreements)+(number of disagreements)  
 Formula p.200 Tate&Perdices, 2019

| Completed                                                                                                                                                                                                                                                                                       | Number | Item                                                   | Comment          |
|-------------------------------------------------------------------------------------------------------------------------------------------------------------------------------------------------------------------------------------------------------------------------------------------------|--------|--------------------------------------------------------|------------------|
| <b>Consent and enrolment</b>                                                                                                                                                                                                                                                                    |        |                                                        |                  |
| X                                                                                                                                                                                                                                                                                               | 1      | Inform and ask to participate, oral or written consent |                  |
| X                                                                                                                                                                                                                                                                                               | 2      | Ask participant about video recording                  |                  |
| x                                                                                                                                                                                                                                                                                               | 3      | Inform team about not giving PRPP-like intervention    |                  |
| x                                                                                                                                                                                                                                                                                               | 4      | Allocate participant to baseline phase 3, 5 or 7 days  | 5 days           |
| <b>Comment:</b>                                                                                                                                                                                                                                                                                 |        |                                                        |                  |
| <b>Baseline phase</b>                                                                                                                                                                                                                                                                           |        |                                                        |                  |
| X                                                                                                                                                                                                                                                                                               | 5      | PRPP Assessment stage 1                                |                  |
| X                                                                                                                                                                                                                                                                                               | 6      | PRPP Assessment stage 1                                |                  |
| X                                                                                                                                                                                                                                                                                               | 7      | PRPP Assessment stage 1                                |                  |
| X                                                                                                                                                                                                                                                                                               | 8      | PRPP Assessment stage 1                                |                  |
| X                                                                                                                                                                                                                                                                                               | 9      | PRPP Assessment stage 1                                | Another assessor |
|                                                                                                                                                                                                                                                                                                 | 10     | PRPP Assessment stage 1 video rec./another assessor    |                  |
| X                                                                                                                                                                                                                                                                                               | 11     | PRPP Assessment stage 2                                |                  |
| X                                                                                                                                                                                                                                                                                               | 12     | PRPP Assessment stage 2                                |                  |
| X                                                                                                                                                                                                                                                                                               | 13     | PRPP Assessment stage 2                                |                  |
| X                                                                                                                                                                                                                                                                                               | 14     | PRPP Assessment stage 2                                |                  |
| X                                                                                                                                                                                                                                                                                               | 15     | PRPP Assessment stage 2                                |                  |
|                                                                                                                                                                                                                                                                                                 | 16     | PRPP Assessment stage 1 video rec./another assessor    |                  |
| X                                                                                                                                                                                                                                                                                               | 17     | Barthel Index                                          |                  |
| X                                                                                                                                                                                                                                                                                               | 18     | GAS                                                    |                  |
| <b>Comment:</b> Misunderstanding that another assessor alone should do the assessment. Also had 6 different activities because participant at one point rejected the planned task, but later was ok with it. Participants allow video recording at consent form but reject it in the situation. |        |                                                        |                  |
| <b>Intervention phase</b>                                                                                                                                                                                                                                                                       |        |                                                        |                  |
| x                                                                                                                                                                                                                                                                                               | 19     | Intervention plan written                              |                  |
| X                                                                                                                                                                                                                                                                                               | 20     | PRPP Intervention 45-60 min                            |                  |
| X                                                                                                                                                                                                                                                                                               | 21     | PRPP Intervention 45-60 min                            |                  |
| X                                                                                                                                                                                                                                                                                               | 22     | PRPP Intervention 45-60 min                            |                  |
| X                                                                                                                                                                                                                                                                                               | 23     | PRPP Intervention 45-60 min                            |                  |
| X                                                                                                                                                                                                                                                                                               | 24     | PRPP Intervention 45-60 min                            |                  |
| X                                                                                                                                                                                                                                                                                               | 25     | PRPP Intervention 45-60 min                            |                  |
| X                                                                                                                                                                                                                                                                                               | 26     | PRPP Intervention 45-60 min                            |                  |
| X                                                                                                                                                                                                                                                                                               | 27     | PRPP Intervention 45-60 min                            |                  |
| X                                                                                                                                                                                                                                                                                               | 28     | PRPP Intervention 45-60 min                            |                  |
| X                                                                                                                                                                                                                                                                                               | 29     | PRPP Assessment stage 1                                |                  |
| X                                                                                                                                                                                                                                                                                               | 30     | PRPP Assessment stage 1                                |                  |
| X                                                                                                                                                                                                                                                                                               | 31     | PRPP Assessment stage 1                                |                  |
| X                                                                                                                                                                                                                                                                                               | 32     | PRPP Assessment stage 1                                |                  |
| X                                                                                                                                                                                                                                                                                               | 33     | PRPP Assessment stage 1                                |                  |
|                                                                                                                                                                                                                                                                                                 | 34     | PRPP Assessment stage 1 video rec./another assessor    |                  |
| X                                                                                                                                                                                                                                                                                               | 35     | PRPP Assessment stage 2                                |                  |
| X                                                                                                                                                                                                                                                                                               | 36     | PRPP Assessment stage 2                                |                  |
| X                                                                                                                                                                                                                                                                                               | 37     | PRPP Assessment stage 2                                |                  |
| X                                                                                                                                                                                                                                                                                               | 38     | PRPP Assessment stage 2                                |                  |
| X                                                                                                                                                                                                                                                                                               | 39     | PRPP Assessment stage 2                                |                  |
|                                                                                                                                                                                                                                                                                                 | 40     | PRPP Assessment stage 1 video rec./another assessor    |                  |

|                                                                                                                                                                                                                                                                                                                                                                                                        |    |                                                     |       |
|--------------------------------------------------------------------------------------------------------------------------------------------------------------------------------------------------------------------------------------------------------------------------------------------------------------------------------------------------------------------------------------------------------|----|-----------------------------------------------------|-------|
| <b>Comment:</b> Participant Carl had 30 interventions, 27 of them before the first post-intervention. Unclear how this disagreement should be noted in this checklist.                                                                                                                                                                                                                                 |    |                                                     |       |
| <b>Post-intervention phase</b>                                                                                                                                                                                                                                                                                                                                                                         |    |                                                     |       |
| X                                                                                                                                                                                                                                                                                                                                                                                                      | 41 | PRPP Assessment stage 1                             |       |
| X                                                                                                                                                                                                                                                                                                                                                                                                      | 42 | PRPP Assessment stage 1                             |       |
| X                                                                                                                                                                                                                                                                                                                                                                                                      | 43 | PRPP Assessment stage 1                             |       |
| X                                                                                                                                                                                                                                                                                                                                                                                                      | 44 | PRPP Assessment stage 1                             |       |
| X                                                                                                                                                                                                                                                                                                                                                                                                      | 45 | PRPP Assessment stage 1                             |       |
|                                                                                                                                                                                                                                                                                                                                                                                                        | 46 | PRPP Assessment stage 1 video rec./another assessor |       |
| X                                                                                                                                                                                                                                                                                                                                                                                                      | 47 | PRPP Assessment stage 2                             |       |
| X                                                                                                                                                                                                                                                                                                                                                                                                      | 48 | PRPP Assessment stage 2                             |       |
| X                                                                                                                                                                                                                                                                                                                                                                                                      | 49 | PRPP Assessment stage 2                             |       |
| X                                                                                                                                                                                                                                                                                                                                                                                                      | 50 | PRPP Assessment stage 2                             |       |
| X                                                                                                                                                                                                                                                                                                                                                                                                      | 51 | PRPP Assessment stage 2                             |       |
|                                                                                                                                                                                                                                                                                                                                                                                                        | 52 | PRPP Assessment stage 1 video rec./another assessor |       |
| X                                                                                                                                                                                                                                                                                                                                                                                                      | 53 | Barthel Index                                       |       |
| X                                                                                                                                                                                                                                                                                                                                                                                                      | 54 | GAS                                                 |       |
| <b>Comment:</b> Participant Carl had two post-intervention-phases. This was because the OT had understood the post-intervention was the two last days of the stay, and not after 9 interventions. As this was cleared, they assessed as soon as possible and a 2-3 weeks later he was discharged and then they assessed post-intervention once more to get a correct baseline for the follow-up phase. |    |                                                     |       |
| <b>Follow-up phase</b>                                                                                                                                                                                                                                                                                                                                                                                 |    |                                                     |       |
| X                                                                                                                                                                                                                                                                                                                                                                                                      | 55 | PRPP Assessment stage 1                             |       |
| X                                                                                                                                                                                                                                                                                                                                                                                                      | 56 | PRPP Assessment stage 1                             |       |
| X                                                                                                                                                                                                                                                                                                                                                                                                      | 57 | PRPP Assessment stage 1                             |       |
| X                                                                                                                                                                                                                                                                                                                                                                                                      | 58 | PRPP Assessment stage 1                             |       |
| X                                                                                                                                                                                                                                                                                                                                                                                                      | 59 | PRPP Assessment stage 1                             |       |
|                                                                                                                                                                                                                                                                                                                                                                                                        | 60 | PRPP Assessment stage 1 video rec./another assessor |       |
| X                                                                                                                                                                                                                                                                                                                                                                                                      | 61 | New task PRPP Assessment stage 1                    | Video |
| X                                                                                                                                                                                                                                                                                                                                                                                                      | 62 | New task PRPP Assessment stage 1                    | Video |
| X                                                                                                                                                                                                                                                                                                                                                                                                      | 63 | PRPP Assessment stage 2                             |       |
| X                                                                                                                                                                                                                                                                                                                                                                                                      | 64 | PRPP Assessment stage 2                             |       |
| X                                                                                                                                                                                                                                                                                                                                                                                                      | 65 | PRPP Assessment stage 2                             |       |
| X                                                                                                                                                                                                                                                                                                                                                                                                      | 66 | PRPP Assessment stage 2                             |       |
| x                                                                                                                                                                                                                                                                                                                                                                                                      | 67 | PRPP Assessment stage 2                             |       |
|                                                                                                                                                                                                                                                                                                                                                                                                        | 68 | PRPP Assessment stage 1 video rec./another assessor |       |
| x                                                                                                                                                                                                                                                                                                                                                                                                      | 69 | New task PRPP Assessment stage 2                    | video |
| X                                                                                                                                                                                                                                                                                                                                                                                                      | 70 | New task PRPP Assessment stage 2                    | video |
| X                                                                                                                                                                                                                                                                                                                                                                                                      | 71 | Barthel Index                                       |       |
| X                                                                                                                                                                                                                                                                                                                                                                                                      | 72 | GAS                                                 |       |
| <b>Comment:</b> Have video recording of putting of organizing breakfast and finding a glass of water and bring it to living room. That means we have possibility for at least 20% IRR in this phase, even not the planned task                                                                                                                                                                         |    |                                                     |       |
| <b>Other</b>                                                                                                                                                                                                                                                                                                                                                                                           |    |                                                     |       |
| X                                                                                                                                                                                                                                                                                                                                                                                                      | 73 | Demographic data                                    |       |
| X                                                                                                                                                                                                                                                                                                                                                                                                      | 74 | Note about PRPP-intervention given by others        |       |
| X                                                                                                                                                                                                                                                                                                                                                                                                      | 75 | Document about treatment as usual                   |       |
| X                                                                                                                                                                                                                                                                                                                                                                                                      | 76 | Document - influence on data collection or results  |       |

|                                                                                              |                       |                                                                           |
|----------------------------------------------------------------------------------------------|-----------------------|---------------------------------------------------------------------------|
| Step-by-step checklist: 76 items<br>80% of 76 items= 60,8.<br>68 agreements, 8 disagreements | 68x100=6800/76= 89,4% | 89%*<br>*way too many intervention sessions not showing in this checklist |
|----------------------------------------------------------------------------------------------|-----------------------|---------------------------------------------------------------------------|
